# Supplementary material for: In Vitro Modulation of Rumen Fermentation by Microbiota from the Recombination of Rumen Fluid and Solid Phases
Source: PubMed Central journal article supplement (PMC9927485; doi:10.1128/spectrum.03387-22), 2022-12-08
Supplement: spectrum.03387-22-s0001.pdf [file spectrum.03387-22-s0001.pdf]

**Table S1.** The ingredients and chemical composition of basal diets (% , as DM basis).

| Ingredients         | Formula | Nutrients <sup>2</sup> | Contents |
|---------------------|---------|------------------------|----------|
| corn                | 34.0    | DM                     | 77.88    |
| Soybean meal        | 10.0    | ME, MJ/kg              | 10.01    |
| Bran                | 12.0    | CP                     | 12.89    |
| Premix <sup>1</sup> | 4.00    | EE                     | 2.14     |
| Corn stalk          | 20.0    | NDF                    | 35.96    |
| Whole corn silage   | 20.0    | ADF                    | 18.46    |
| Total               | 100     | Ash                    | 9.71     |
|                     |         | Ca                     | 1.11     |
|                     |         | P                      | 0.31     |

Abbreviations: DM, dry matter; ME, Metabolizable energy; CP, crude protein; EE, ether extract; NDF, neutral detergent fiber; ADF, acid detergent fiber.

<sup>1</sup> The premix provides per kg of diet: vitamin A, 7000 IU; vitamin D3, 2480 IU; vitamin E, 500 mg; nicotinic acid, 15 mg; biotin, 0.05 mg; Cu, 8 mg; Fe, 40 mg; Mn, 20 mg; Zn, 40 mg; I, 0.4 mg; Se, 0.4 mg; Co, 0.3 mg; NaCl, 2.4 g; Ca, 3.2 g; P, 0.48 g.

<sup>2</sup> Nutrients were all measured values except metabolizable energy, which was calculated by the equations from NRC (1).

**Table S2.** Effects of different combination of rumen fluid and solid phases on gas production *in vitro*

| Items <sup>1</sup> | FF                  |                    |                     |                     | AF                  |                    |                    |                    | SEM   | P-value |        |        |
|--------------------|---------------------|--------------------|---------------------|---------------------|---------------------|--------------------|--------------------|--------------------|-------|---------|--------|--------|
|                    | FS                  | AS                 | FW                  | AW                  | FS                  | AS                 | FW                 | AW                 |       | Fluid   | Solid  | F×S    |
| 3 hours            | 37.80 <sup>b</sup>  | 31.13 <sup>c</sup> | 16.13 <sup>c</sup>  | 19.40 <sup>c</sup>  | 52.10 <sup>a</sup>  | 1.00 <sup>d</sup>  | 20.80 <sup>c</sup> | 1.00 <sup>d</sup>  | 0.667 | <0.001  | <0.001 | <0.001 |
| 6 hours            | 58.40 <sup>b</sup>  | 50.75 <sup>c</sup> | 29.88 <sup>de</sup> | 32.80 <sup>de</sup> | 74.70 <sup>a</sup>  | 28.33 <sup>e</sup> | 35.80 <sup>d</sup> | 6.75 <sup>f</sup>  | 0.803 | <0.001  | <0.001 | <0.001 |
| 9 hours            | 70.40 <sup>b</sup>  | 59.88 <sup>c</sup> | 34.38 <sup>d</sup>  | 38.00 <sup>d</sup>  | 86.70 <sup>a</sup>  | 37.00 <sup>d</sup> | 40.40 <sup>d</sup> | 14.00 <sup>e</sup> | 0.922 | <0.001  | <0.001 | <0.001 |
| 12 hours           | 80.80 <sup>b</sup>  | 68.88 <sup>c</sup> | 42.88 <sup>d</sup>  | 41.60 <sup>d</sup>  | 94.90 <sup>a</sup>  | 43.00 <sup>d</sup> | 43.80 <sup>d</sup> | 17.75 <sup>e</sup> | 1.086 | <0.001  | <0.001 | <0.001 |
| 18 hours           | 92.60 <sup>b</sup>  | 80.88 <sup>c</sup> | 46.63 <sup>d</sup>  | 46.80 <sup>d</sup>  | 103.90 <sup>a</sup> | 47.00 <sup>d</sup> | 48.40 <sup>d</sup> | 20.00 <sup>e</sup> | 1.136 | <0.001  | <0.001 | <0.001 |
| 24 hours           | 98.40 <sup>ab</sup> | 87.88 <sup>b</sup> | 51.13 <sup>c</sup>  | 50.20 <sup>c</sup>  | 108.90 <sup>a</sup> | 48.33 <sup>c</sup> | 50.40 <sup>c</sup> | 20.75 <sup>d</sup> | 1.304 | <0.001  | <0.001 | <0.001 |

<sup>1</sup>V<sub>12h</sub> gas production at 12 hours; V<sub>max</sub>, the asymptotic gas volume; K, the constant gas production rate; MCP, Microbial crude protein; TVFA, total volatile fatty acids; APratio, acetate to propionate ratio. Each group includes two factors, one factor is rumen fluid phase, which included two levels: fresh fluid (FF) and autoclaved FF (AF); The other factor is rumen solid phase, which included four levels: fresh solid (FS), autoclaved FS (AS), fresh solid washing solution (FW), and autoclaved FW (AW).

SEM=standard error of the means.

a, b, c, d, e, f Means in the same row with different superscripts indicate significant difference (P < 0.05).

**Table S3.** Effects of different combination of rumen fluid and solid phases on fermentation parameters *in vitro*

| Items <sup>1</sup>        | FF                   |                     |                     |                     | AF                  |                     |                     |                    | SEM   | P-value |        |        |
|---------------------------|----------------------|---------------------|---------------------|---------------------|---------------------|---------------------|---------------------|--------------------|-------|---------|--------|--------|
|                           | FS                   | AS                  | FW                  | AW                  | FS                  | AS                  | FW                  | AW                 |       | Fluid   | Solid  | F×S    |
| V <sub>12h</sub> , mL     | 75.50 <sup>b</sup>   | 65.22 <sup>c</sup>  | 38.34 <sup>d</sup>  | 39.86 <sup>d</sup>  | 89.65 <sup>a</sup>  | 38.08 <sup>d</sup>  | 41.85 <sup>d</sup>  | 14.06 <sup>c</sup> | 0.458 | 0.060   | <0.001 | <0.001 |
| V <sub>max</sub> , mL     | 100.50 <sup>ab</sup> | 90.93 <sup>b</sup>  | 53.62 <sup>c</sup>  | 50.54 <sup>c</sup>  | 107.17 <sup>a</sup> | 56.59 <sup>c</sup>  | 50.22 <sup>c</sup>  | 29.83 <sup>d</sup> | 1.449 | <0.001  | <0.001 | <0.001 |
| K, mL/h                   | 0.14 <sup>bc</sup>   | 0.13 <sup>bc</sup>  | 0.13 <sup>c</sup>   | 0.17 <sup>ab</sup>  | 0.20 <sup>a</sup>   | 0.10 <sup>cd</sup>  | 0.19 <sup>a</sup>   | 0.07 <sup>d</sup>  | 0.005 | 0.789   | 0.001  | <0.001 |
| pH                        | 5.57 <sup>d</sup>    | 5.56 <sup>d</sup>   | 6.51 <sup>a</sup>   | 6.50 <sup>a</sup>   | 5.44 <sup>c</sup>   | 5.70 <sup>c</sup>   | 6.32 <sup>b</sup>   | 6.33 <sup>b</sup>  | 0.007 | <0.001  | <0.001 | <0.001 |
| NH <sub>3</sub> -N, mg/dl | 42.40 <sup>ab</sup>  | 41.93 <sup>ab</sup> | 35.68 <sup>c</sup>  | 36.91 <sup>bc</sup> | 45.88 <sup>a</sup>  | 27.99 <sup>d</sup>  | 32.63 <sup>cd</sup> | 21.43 <sup>c</sup> | 0.648 | <0.001  | <0.001 | <0.001 |
| MCP, mg/ml                | 3.60 <sup>bc</sup>   | 5.55 <sup>a</sup>   | 4.50 <sup>ab</sup>  | 4.82 <sup>ab</sup>  | 4.22 <sup>ab</sup>  | 2.47 <sup>cd</sup>  | 3.63 <sup>bc</sup>  | 1.52 <sup>d</sup>  | 0.163 | <0.001  | 0.195  | <0.001 |
| Lactate, mmol/L           | 0.05 <sup>c</sup>    | 0.20 <sup>c</sup>   | 0.00 <sup>c</sup>   | 0.25 <sup>c</sup>   | 0.05 <sup>c</sup>   | 46.25 <sup>a</sup>  | 0.05 <sup>c</sup>   | 18.38 <sup>b</sup> | 0.560 | <0.001  | <0.001 | <0.001 |
| Formate, mmol/L           | 0.62 <sup>c</sup>    | 0.61 <sup>c</sup>   | 0.64 <sup>c</sup>   | 0.66 <sup>c</sup>   | 0.72 <sup>c</sup>   | 7.85 <sup>a</sup>   | 0.61 <sup>c</sup>   | 2.51 <sup>b</sup>  | 0.151 | <0.001  | <0.001 | <0.001 |
| TVFA, mmol/L              | 120.69 <sup>ab</sup> | 115.40 <sup>b</sup> | 44.43 <sup>cd</sup> | 53.66 <sup>c</sup>  | 132.99 <sup>a</sup> | 43.44 <sup>cd</sup> | 55.28 <sup>c</sup>  | 28.71 <sup>d</sup> | 1.928 | <0.001  | <0.001 | <0.001 |
| Acetate, mmol/L           | 68.11 <sup>a</sup>   | 64.54 <sup>a</sup>  | 25.70 <sup>ab</sup> | 30.80 <sup>b</sup>  | 66.70 <sup>a</sup>  | 24.38 <sup>bc</sup> | 29.94 <sup>b</sup>  | 17.73 <sup>c</sup> | 1.150 | <0.001  | <0.001 | <0.001 |
| Propionate, mmol/L        | 33.01 <sup>b</sup>   | 32.27 <sup>b</sup>  | 9.64 <sup>de</sup>  | 11.86 <sup>d</sup>  | 40.79 <sup>a</sup>  | 11.09 <sup>d</sup>  | 16.33 <sup>c</sup>  | 6.06 <sup>c</sup>  | 0.449 | 0.002   | <0.001 | <0.001 |
| Butyrate, mmol/L          | 13.85 <sup>b</sup>   | 13.11 <sup>b</sup>  | 6.33 <sup>c</sup>   | 7.67 <sup>c</sup>   | 17.79 <sup>a</sup>  | 6.07 <sup>c</sup>   | 5.82 <sup>c</sup>   | 3.48 <sup>d</sup>  | 0.272 | 0.001   | <0.001 | <0.001 |
| Valerate, mmol/L          | 2.71 <sup>b</sup>    | 2.47 <sup>b</sup>   | 1.03 <sup>cd</sup>  | 1.29 <sup>cd</sup>  | 3.67 <sup>a</sup>   | 0.85 <sup>d</sup>   | 1.50 <sup>c</sup>   | 0.81 <sup>d</sup>  | 0.060 | 0.176   | <0.001 | <0.001 |
| Isobutyrate, mmol/L       | 1.27 <sup>b</sup>    | 1.23 <sup>b</sup>   | 0.70 <sup>cd</sup>  | 0.72 <sup>cd</sup>  | 1.54 <sup>a</sup>   | 0.65 <sup>cd</sup>  | 0.86 <sup>c</sup>   | 0.61 <sup>d</sup>  | 0.024 | <0.001  | <0.001 | <0.001 |
| Isovalerate, mmol/L       | 1.74 <sup>b</sup>    | 1.78 <sup>b</sup>   | 1.03 <sup>cd</sup>  | 1.33 <sup>c</sup>   | 2.50 <sup>a</sup>   | 0.39 <sup>e</sup>   | 0.82 <sup>d</sup>   | 0.38 <sup>e</sup>  | 0.042 | <0.001  | <0.001 | <0.001 |
| APratio                   | 2.06 <sup>cd</sup>   | 1.99 <sup>dc</sup>  | 2.66 <sup>b</sup>   | 2.59 <sup>b</sup>   | 1.63 <sup>f</sup>   | 2.20 <sup>c</sup>   | 1.83 <sup>e</sup>   | 2.89 <sup>a</sup>  | 0.023 | <0.001  | <0.001 | <0.001 |

<sup>1</sup>V<sub>12h</sub> gas production at 12 hours; V<sub>max</sub>, the asymptotic gas volume; K, the constant gas production rate; MCP, Microbial crude protein; TVFA, total volatile fatty acids; APratio, acetate to propionate ratio. Each group includes two factors, one factor is rumen fluid phase, which included two levels: fresh fluid (FF) and autoclaved FF (AF); The other factor is rumen solid phase, which included four levels: fresh solid (FS), autoclaved FS (AS), fresh solid washing solution (FW), and autoclaved FW (AW).

SEM=standard error of the means.

a, b, c, d, e, f Means in the same row with different superscripts indicate significant difference (P < 0.05).

**Table S4.** Effects of different combination of rumen fluid and solid phases on gas production *in vitro*

| Items <sup>1</sup> | FF                   |                      |                      |                      | AF                  |                     |                      |                    | SEM    | P-value |        |        |
|--------------------|----------------------|----------------------|----------------------|----------------------|---------------------|---------------------|----------------------|--------------------|--------|---------|--------|--------|
|                    | FS                   | AS                   | FW                   | AW                   | FS                  | AS                  | FW                   | AW                 |        | Fluid   | Solid  | F×S    |
| Observed species   | 949.60 <sup>ab</sup> | 1044.98 <sup>a</sup> | 1056.00 <sup>a</sup> | 1018.32 <sup>a</sup> | 860.60 <sup>b</sup> | 102.00 <sup>c</sup> | 1037.56 <sup>a</sup> | 96.00 <sup>c</sup> | 11.780 | <0.001  | <0.001 | <0.001 |
| Shannon Index      | 6.18 <sup>ab</sup>   | 6.61 <sup>ab</sup>   | 6.79 <sup>a</sup>    | 6.41 <sup>ab</sup>   | 6.09 <sup>b</sup>   | 2.21 <sup>c</sup>   | 6.72 <sup>a</sup>    | 2.33 <sup>c</sup>  | 0.070  | <0.001  | <0.001 | <0.001 |

<sup>1</sup>V<sub>12h</sub> gas production at 12 hours; Vmax, the asymptotic gas volume; K, the constant gas production rate; MCP, Microbial crude protein; TVFA, total volatile fatty acids; APratio, acetate to propionate ratio. Each group includes two factors, one factor is rumen fluid phase, which included two levels: fresh fluid (FF) and autoclaved FF (AF); The other factor is rumen solid phase, which included four levels: fresh solid (FS), autoclaved FS (AS), fresh solid washing solution (FW), and autoclaved FW (AW).

SEM=standard error of the means.

<sup>a, b, c, d, e, f</sup> Means in the same row with different superscripts indicate significant difference (P < 0.05).

**Table S5.** Effects of different combination of rumen fluid and solid phases on composition of microbiota at the genus level.

| Items <sup>1</sup>                   | FF                  |                     |                     |                     | AF                 |                    |                     |                    | SEM    | P-value |        |        |
|--------------------------------------|---------------------|---------------------|---------------------|---------------------|--------------------|--------------------|---------------------|--------------------|--------|---------|--------|--------|
|                                      | FS                  | AS                  | FW                  | AW                  | FS                 | AS                 | FW                  | AW                 |        | Fulid   | Solid  | F×S    |
| <i>Prevotella</i>                    | 36.26 <sup>ab</sup> | 38.59 <sup>a</sup>  | 32.09 <sup>ab</sup> | 41.08 <sup>a</sup>  | 28.18 <sup>b</sup> | 2.18 <sup>c</sup>  | 27.45 <sup>b</sup>  | 0.48 <sup>c</sup>  | 15.130 | <0.001  | <0.001 | <0.001 |
| <i>Succinivibrio</i>                 | 19.11 <sup>b</sup>  | 10.80 <sup>c</sup>  | 11.68 <sup>c</sup>  | 10.93 <sup>c</sup>  | 31.01 <sup>a</sup> | 0.71 <sup>d</sup>  | 15.95 <sup>bc</sup> | 0.56 <sup>d</sup>  | 9.981  | 0.536   | <0.001 | <0.001 |
| <i>Streptococcus</i>                 | 0.03 <sup>c</sup>   | 0.01 <sup>c</sup>   | 0.02 <sup>c</sup>   | 0.01 <sup>c</sup>   | 0.21 <sup>c</sup>  | 45.20 <sup>b</sup> | 0.16 <sup>c</sup>   | 62.46 <sup>a</sup> | 23.002 | <0.001  | <0.001 | <0.001 |
| <i>Rikenellaceae_RC9_gut_group</i>   | 5.78 <sup>c</sup>   | 9.14 <sup>a</sup>   | 9.58 <sup>a</sup>   | 8.13 <sup>ab</sup>  | 3.91 <sup>d</sup>  | 0.00 <sup>e</sup>  | 6.62 <sup>bc</sup>  | 0.00 <sup>e</sup>  | 3.520  | <0.001  | 0.001  | <0.001 |
| <i>Prevotellaceae_YAB2003_group</i>  | 0.07 <sup>c</sup>   | 0.05 <sup>c</sup>   | 0.05 <sup>c</sup>   | 0.07 <sup>c</sup>   | 0.10 <sup>c</sup>  | 37.00 <sup>a</sup> | 0.32 <sup>c</sup>   | 6.74 <sup>b</sup>  | 11.034 | 0.001   | 0.001  | 0.001  |
| <i>Succiniclasticum</i>              | 4.84 <sup>a</sup>   | 3.71 <sup>abc</sup> | 4.28 <sup>ab</sup>  | 2.96 <sup>bcd</sup> | 2.56 <sup>cd</sup> | 0.00 <sup>e</sup>  | 2.10 <sup>d</sup>   | 0.01 <sup>e</sup>  | 1.839  | <0.001  | <0.001 | 0.121  |
| <i>Christensenellaceae_R-7_group</i> | 3.58 <sup>a</sup>   | 3.45 <sup>ab</sup>  | 2.52 <sup>bc</sup>  | 2.72 <sup>abc</sup> | 2.12 <sup>c</sup>  | 0.00 <sup>d</sup>  | 2.33 <sup>c</sup>   | 0.00 <sup>d</sup>  | 1.356  | <0.001  | <0.001 | <0.001 |
| <i>Veillonellaceae_UCG-001</i>       | 1.81 <sup>bc</sup>  | 1.34 <sup>cd</sup>  | 2.86 <sup>a</sup>   | 2.40 <sup>ab</sup>  | 0.94 <sup>d</sup>  | 0.00 <sup>e</sup>  | 1.75 <sup>bc</sup>  | 0.00 <sup>e</sup>  | 1.030  | <0.001  | <0.001 | 0.032  |
| <i>Clostridium_sensu_stricto_1</i>   | 0.00 <sup>c</sup>   | 0.00 <sup>c</sup>   | 0.00 <sup>c</sup>   | 0.00 <sup>c</sup>   | 0.02 <sup>c</sup>  | 4.07 <sup>b</sup>  | 0.03 <sup>c</sup>   | 8.45 <sup>a</sup>  | 3.424  | <0.001  | <0.001 | <0.001 |
| <i>Prevotellaceae_UCG-003</i>        | 1.14 <sup>bc</sup>  | 0.81 <sup>bcd</sup> | 2.38 <sup>a</sup>   | 3.04 <sup>a</sup>   | 0.60 <sup>cd</sup> | 0.00 <sup>d</sup>  | 1.51 <sup>b</sup>   | 0.00 <sup>d</sup>  | 1.131  | <0.001  | 0.264  | 0.027  |
| <i>Treponema</i>                     | 2.71 <sup>a</sup>   | 2.49 <sup>a</sup>   | 0.35 <sup>b</sup>   | 0.28 <sup>b</sup>   | 2.80 <sup>a</sup>  | 0.00 <sup>b</sup>  | 0.98 <sup>b</sup>   | 0.00 <sup>b</sup>  | 1.327  | 0.212   | 0.008  | 0.074  |
| <i>Prevotellaceae_UCG-001</i>        | 1.20 <sup>b</sup>   | 1.82 <sup>a</sup>   | 1.71 <sup>a</sup>   | 1.90 <sup>a</sup>   | 0.89 <sup>b</sup>  | 0.00 <sup>c</sup>  | 1.02 <sup>b</sup>   | 0.01 <sup>c</sup>  | 0.698  | <0.001  | 0.005  | <0.001 |
| <i>Ruminobacter</i>                  | 0.04 <sup>b</sup>   | 0.02 <sup>b</sup>   | 0.23 <sup>b</sup>   | 0.48 <sup>b</sup>   | 0.62 <sup>b</sup>  | 0.00 <sup>b</sup>  | 6.75 <sup>a</sup>   | 0.00 <sup>b</sup>  | 3.060  | 0.086   | 0.066  | 0.047  |
| <i>Selenomonas</i>                   | 0.62 <sup>c</sup>   | 0.42 <sup>cd</sup>  | 0.59 <sup>c</sup>   | 0.67 <sup>c</sup>   | 1.86 <sup>b</sup>  | 2.45 <sup>a</sup>  | 1.77 <sup>b</sup>   | 0.05 <sup>d</sup>  | 0.800  | <0.001  | 0.076  | 0.115  |
| <i>Fretibacterium</i>                | 0.22 <sup>d</sup>   | 0.26 <sup>d</sup>   | 3.01 <sup>a</sup>   | 2.46 <sup>b</sup>   | 0.03 <sup>d</sup>  | 0.00 <sup>d</sup>  | 0.84 <sup>c</sup>   | 0.00 <sup>d</sup>  | 1.178  | 0.001   | 0.567  | 0.526  |
| <i>Ruminococcus</i>                  | 1.37 <sup>ab</sup>  | 1.05 <sup>b</sup>   | 0.33 <sup>c</sup>   | 0.34 <sup>c</sup>   | 1.45 <sup>a</sup>  | 0.00 <sup>c</sup>  | 1.16 <sup>ab</sup>  | 0.00 <sup>c</sup>  | 0.607  | 0.372   | <0.001 | <0.001 |
| <i>Succinivibrionaceae_UCG-002</i>   | 0.18 <sup>b</sup>   | 0.10 <sup>b</sup>   | 0.80 <sup>b</sup>   | 0.70 <sup>b</sup>   | 1.68 <sup>a</sup>  | 0.00 <sup>b</sup>  | 2.05 <sup>a</sup>   | 0.00 <sup>b</sup>  | 0.923  | 0.022   | <0.001 | <0.001 |
| <i>Veillonella</i>                   | 0.00 <sup>b</sup>   | 0.00 <sup>b</sup>   | 0.00 <sup>b</sup>   | 0.00 <sup>b</sup>   | 0.00 <sup>b</sup>  | 0.06 <sup>b</sup>  | 0.00 <sup>b</sup>   | 6.27 <sup>a</sup>  | 2.660  | 0.030   | 0.030  | 0.030  |
| <i>Anaerovibrio</i>                  | 0.35 <sup>c</sup>   | 0.30 <sup>cd</sup>  | 1.09 <sup>b</sup>   | 1.43 <sup>a</sup>   | 0.46 <sup>c</sup>  | 0.00 <sup>d</sup>  | 1.33 <sup>ab</sup>  | 0.03 <sup>d</sup>  | 0.574  | 0.041   | 0.063  | 0.002  |
| <i>Lachnospiraceae_NK3A20_group</i>  | 0.80 <sup>b</sup>   | 0.96 <sup>ab</sup>  | 0.60 <sup>b</sup>   | 0.65 <sup>b</sup>   | 0.77 <sup>b</sup>  | 0.02 <sup>c</sup>  | 1.32 <sup>a</sup>   | 0.00 <sup>c</sup>  | 0.492  | 0.064   | <0.001 | <0.001 |
| <i>Lachnoclostridium</i>             | 0.31 <sup>c</sup>   | 0.48 <sup>c</sup>   | 1.18 <sup>ab</sup>  | 0.54 <sup>c</sup>   | 0.24 <sup>c</sup>  | 0.39 <sup>c</sup>  | 0.73 <sup>bc</sup>  | 1.35 <sup>a</sup>  | 0.504  | 0.544   | 0.430  | 0.069  |
| <i>NK4A214_group</i>                 | 0.74 <sup>a</sup>   | 0.89 <sup>a</sup>   | 0.85 <sup>a</sup>   | 0.82 <sup>a</sup>   | 0.41 <sup>b</sup>  | 0.00 <sup>c</sup>  | 0.82 <sup>a</sup>   | 0.00 <sup>c</sup>  | 0.392  | <0.001  | 0.002  | <0.001 |

<sup>1</sup>Each group includes two factors, one factor is rumen fluid phase, which included two levels: fresh fluid (FF) and autoclaved FF (AF); The other factor is rumen solid phase, which included four levels: fresh solid (FS), autoclaved FS (AS), fresh solid washing solution (FW), and autoclaved FW (AW).

**Table S6.** Analysis of similarities (ANOSIM) output for beta diversity

| Comparison <sup>1</sup> | R    | <i>P</i> -value |
|-------------------------|------|-----------------|
| FFFS vs FFAS            | 0.48 | 0.024           |
| FFFS vs AFFS            | 0.90 | 0.006           |
| FFFS vs AFAS            | 1.00 | 0.010           |
| FFFS vs FFFW            | 0.84 | 0.011           |
| FFFS vs FFAW            | 1.00 | 0.009           |
| FFFS vs AFFW            | 1.00 | 0.010           |
| FFFS vs AFAW            | 1.00 | 0.012           |
| FFAS vs AFFS            | 0.94 | 0.008           |
| FFAS vs AFAS            | 1.00 | 0.025           |
| FFAS vs FFFW            | 0.71 | 0.007           |
| FFAS vs FFAW            | 0.97 | 0.007           |
| FFAS vs AFFW            | 0.93 | 0.012           |
| FFAS vs AFAW            | 1.00 | 0.030           |
| AFFS vs AFAS            | 1.00 | 0.005           |
| AFFS vs FFFW            | 1.00 | 0.004           |
| AFFS vs FFAW            | 1.00 | 0.008           |
| AFFS vs AFFW            | 1.00 | 0.010           |
| AFFS vs AFAW            | 1.00 | 0.010           |
| AFAS vs FFFW            | 1.00 | 0.007           |
| AFAS vs FFAW            | 1.00 | 0.009           |
| AFAS vs AFFW            | 1.00 | 0.007           |
| AFAS vs AFAW            | 0.82 | 0.027           |
| FFFW vs FFAW            | 0.44 | 0.036           |
| FFFW vs AFFW            | 0.79 | 0.012           |
| FFFW vs AFAW            | 1.00 | 0.006           |
| FFAW vs AFFW            | 0.94 | 0.011           |
| FFAW vs AFAW            | 1.00 | 0.006           |
| AFFW vs AFAW            | 1.00 | 0.008           |

<sup>1</sup> FFFS = fresh fluid (FF) + fresh solid (FS); FFAS = fresh fluid (FF) + autoclaved solid (AS); FFFW = fresh fluid (FF) + fresh solid washing solution (FW); FFAW = fresh fluid (FF) + autoclaved solid washing solution (AW); AFFS = autoclaved fluid (AF) + fresh solid (FS); AFAS = autoclaved fluid (AF) + autoclaved solid (AS); AFFW = autoclaved fluid (AF) + fresh solid washing solution (FW); AFAW = autoclaved fluid (AF) + autoclaved solid washing solution (AW).

**Table S7.** Functional predictions for rumen microbiota in eight treatments; only the marked KEGG pathways in the essay were shown.

| Items <sup>1</sup>                                  | FF                  |                     |                     |                     | AF                 |                    |                     |                     | SEM   | P-value |
|-----------------------------------------------------|---------------------|---------------------|---------------------|---------------------|--------------------|--------------------|---------------------|---------------------|-------|---------|
|                                                     | FS                  | AS                  | FW                  | AW                  | FS                 | AS                 | FW                  | AW                  |       |         |
| <b>Metabolism</b>                                   | 78.72 <sup>b</sup>  | 79.34 <sup>a</sup>  | 79.36 <sup>a</sup>  | 79.54 <sup>a</sup>  | 77.85 <sup>c</sup> | 78.15 <sup>c</sup> | 78.67 <sup>b</sup>  | 77.84 <sup>c</sup>  | 0.116 | <0.001  |
| <b>Amino acid metabolism</b>                        | 12.99 <sup>a</sup>  | 12.89 <sup>ab</sup> | 12.89 <sup>ab</sup> | 12.89 <sup>ab</sup> | 12.71 <sup>b</sup> | 12.05 <sup>c</sup> | 12.72 <sup>b</sup>  | 12.70 <sup>b</sup>  | 0.049 | 0.003   |
| Valine, leucine and isoleucine biosynthesis         | 2.27 <sup>b</sup>   | 2.21 <sup>b</sup>   | 2.26 <sup>b</sup>   | 2.23 <sup>b</sup>   | 2.28 <sup>b</sup>  | 2.01 <sup>c</sup>  | 2.28 <sup>b</sup>   | 2.41 <sup>a</sup>   | 0.020 | 0.004   |
| Alanine, aspartate and glutamate metabolism         | 1.89 <sup>a</sup>   | 1.87 <sup>a</sup>   | 1.81 <sup>b</sup>   | 1.86 <sup>ab</sup>  | 1.85 <sup>ab</sup> | 1.55 <sup>c</sup>  | 1.80 <sup>b</sup>   | 1.42 <sup>d</sup>   | 0.027 | <0.001  |
| Lysine biosynthesis                                 | 1.63 <sup>b</sup>   | 1.59 <sup>b</sup>   | 1.63 <sup>b</sup>   | 1.64 <sup>b</sup>   | 1.60 <sup>b</sup>  | 1.60 <sup>b</sup>  | 1.63 <sup>b</sup>   | 1.70 <sup>a</sup>   | 0.007 | 0.006   |
| Phenylalanine, tyrosine and tryptophan biosynthesis | 1.39 <sup>bc</sup>  | 1.37 <sup>cd</sup>  | 1.34 <sup>d</sup>   | 1.36 <sup>cd</sup>  | 1.39 <sup>c</sup>  | 1.43 <sup>ab</sup> | 1.37 <sup>cd</sup>  | 1.46 <sup>a</sup>   | 0.007 | <0.001  |
| Cysteine and methionine metabolism                  | 1.29 <sup>b</sup>   | 1.27 <sup>bc</sup>  | 1.25 <sup>c</sup>   | 1.25 <sup>c</sup>   | 1.29 <sup>b</sup>  | 1.44 <sup>a</sup>  | 1.26 <sup>bc</sup>  | 1.45 <sup>a</sup>   | 0.013 | <0.001  |
| Histidine metabolism                                | 1.28 <sup>bc</sup>  | 1.28 <sup>bc</sup>  | 1.30 <sup>b</sup>   | 1.29 <sup>bc</sup>  | 1.25 <sup>d</sup>  | 1.29 <sup>b</sup>  | 1.25 <sup>cd</sup>  | 1.39 <sup>a</sup>   | 0.008 | <0.001  |
| Glycine, serine and threonine metabolism            | 1.18 <sup>b</sup>   | 1.18 <sup>b</sup>   | 1.18 <sup>b</sup>   | 1.18 <sup>b</sup>   | 1.16 <sup>c</sup>  | 1.23 <sup>a</sup>  | 1.16 <sup>c</sup>   | 1.18 <sup>b</sup>   | 0.004 | <0.001  |
| Arginine and proline metabolism                     | 0.75 <sup>a</sup>   | 0.76 <sup>a</sup>   | 0.77 <sup>a</sup>   | 0.77 <sup>a</sup>   | 0.70 <sup>c</sup>  | 0.56 <sup>e</sup>  | 0.72 <sup>b</sup>   | 0.61 <sup>d</sup>   | 0.012 | <0.001  |
| Valine, leucine and isoleucine degradation          | 0.40 <sup>c</sup>   | 0.44 <sup>b</sup>   | 0.47 <sup>a</sup>   | 0.44 <sup>b</sup>   | 0.33 <sup>d</sup>  | 0.26 <sup>e</sup>  | 0.39 <sup>c</sup>   | 0.34 <sup>d</sup>   | 0.011 | <0.001  |
| Phenylalanine metabolism                            | 0.38 <sup>ab</sup>  | 0.38 <sup>ab</sup>  | 0.37 <sup>abc</sup> | 0.39 <sup>a</sup>   | 0.36 <sup>bc</sup> | 0.20 <sup>d</sup>  | 0.35 <sup>c</sup>   | 0.18 <sup>d</sup>   | 0.013 | <0.001  |
| <b>Carbohydrate metabolism</b>                      | 13.71 <sup>cd</sup> | 13.85 <sup>c</sup>  | 13.57 <sup>cd</sup> | 13.74 <sup>cd</sup> | 13.40 <sup>d</sup> | 14.47 <sup>b</sup> | 13.75 <sup>cd</sup> | 15.48 <sup>a</sup>  | 0.108 | <0.001  |
| C5-Branched dibasic acid metabolism                 | 1.77 <sup>bc</sup>  | 1.64 <sup>cd</sup>  | 1.74 <sup>c</sup>   | 1.71 <sup>c</sup>   | 1.93 <sup>a</sup>  | 1.56 <sup>d</sup>  | 1.89 <sup>ab</sup>  | 1.95 <sup>a</sup>   | 0.026 | 0.001   |
| Pentose phosphate pathway                           | 1.50 <sup>ab</sup>  | 1.50 <sup>abc</sup> | 1.48 <sup>bc</sup>  | 1.46 <sup>cd</sup>  | 1.53 <sup>a</sup>  | 1.43 <sup>d</sup>  | 1.53 <sup>a</sup>   | 1.50 <sup>abc</sup> | 0.006 | 0.001   |
| Amino sugar and nucleotide sugar metabolism         | 1.14 <sup>bc</sup>  | 1.17 <sup>b</sup>   | 1.10 <sup>c</sup>   | 1.13 <sup>bc</sup>  | 1.09 <sup>c</sup>  | 1.31 <sup>a</sup>  | 1.11 <sup>c</sup>   | 1.31 <sup>a</sup>   | 0.014 | <0.001  |
| Glycolysis / Gluconeogenesis                        | 1.01 <sup>c</sup>   | 1.03 <sup>c</sup>   | 1.01 <sup>c</sup>   | 1.01 <sup>c</sup>   | 0.99 <sup>c</sup>  | 1.51 <sup>b</sup>  | 1.02 <sup>c</sup>   | 1.58 <sup>a</sup>   | 0.037 | <0.001  |
| Citrate cycle (TCA cycle)                           | 1.14 <sup>a</sup>   | 1.14 <sup>a</sup>   | 1.15 <sup>a</sup>   | 1.15 <sup>a</sup>   | 1.10 <sup>ab</sup> | 1.13 <sup>ab</sup> | 1.09 <sup>c</sup>   | 0.95 <sup>d</sup>   | 0.011 | <0.001  |
| Galactose metabolism                                | 1.00 <sup>c</sup>   | 1.06 <sup>c</sup>   | 0.99 <sup>cd</sup>  | 1.05 <sup>c</sup>   | 0.90 <sup>d</sup>  | 1.35 <sup>b</sup>  | 0.99 <sup>cd</sup>  | 1.47 <sup>a</sup>   | 0.031 | <0.001  |
| Starch and sucrose metabolism                       | 1.07 <sup>ab</sup>  | 1.16 <sup>a</sup>   | 1.03 <sup>bc</sup>  | 1.09 <sup>ab</sup>  | 0.97 <sup>c</sup>  | 1.14 <sup>a</sup>  | 1.07 <sup>ab</sup>  | 1.14 <sup>a</sup>   | 0.013 | 0.002   |
| Fructose and mannose metabolism                     | 1.03 <sup>cd</sup>  | 1.07 <sup>bc</sup>  | 1.01 <sup>cd</sup>  | 1.06 <sup>bc</sup>  | 0.95 <sup>e</sup>  | 1.19 <sup>a</sup>  | 0.98 <sup>de</sup>  | 1.12 <sup>b</sup>   | 0.014 | <0.001  |
| Pyruvate metabolism                                 | 0.94 <sup>cd</sup>  | 0.94 <sup>cd</sup>  | 0.95 <sup>cd</sup>  | 0.92 <sup>d</sup>   | 0.94 <sup>cd</sup> | 1.18 <sup>b</sup>  | 0.98 <sup>c</sup>   | 1.33 <sup>a</sup>   | 0.023 | <0.001  |
| Pentose and glucuronate interconversions            | 0.80 <sup>ab</sup>  | 0.84 <sup>a</sup>   | 0.78 <sup>ab</sup>  | 0.82 <sup>ab</sup>  | 0.71 <sup>c</sup>  | 0.28 <sup>e</sup>  | 0.76 <sup>bc</sup>  | 0.36 <sup>d</sup>   | 0.034 | <0.001  |
| <b>Metabolism of cofactors and vitamins</b>         | 14.59 <sup>a</sup>  | 14.33 <sup>a</sup>  | 14.30 <sup>a</sup>  | 14.63 <sup>a</sup>  | 14.52 <sup>a</sup> | 12.92 <sup>b</sup> | 14.18 <sup>a</sup>  | 12.13 <sup>c</sup>  | 0.143 | 0.001   |
| One carbon pool by folate                           | 2.03 <sup>b</sup>   | 2.04 <sup>b</sup>   | 1.97 <sup>bc</sup>  | 2.03 <sup>b</sup>   | 1.95 <sup>c</sup>  | 2.14 <sup>a</sup>  | 1.92 <sup>c</sup>   | 1.83 <sup>d</sup>   | 0.017 | <0.001  |
| Folate biosynthesis                                 | 1.51 <sup>c</sup>   | 1.44 <sup>c</sup>   | 1.44 <sup>c</sup>   | 1.47 <sup>c</sup>   | 1.63 <sup>b</sup>  | 1.85 <sup>a</sup>  | 1.45 <sup>c</sup>   | 1.66 <sup>b</sup>   | 0.024 | <0.001  |

| Items <sup>1</sup>                                  | FF                  |                    |                    |                    | AF                 |                    |                     |                   | SEM   | P-value |
|-----------------------------------------------------|---------------------|--------------------|--------------------|--------------------|--------------------|--------------------|---------------------|-------------------|-------|---------|
|                                                     | FS                  | AS                 | FW                 | AW                 | FS                 | AS                 | FW                  | AW                |       |         |
| Thiamine metabolism                                 | 1.62 <sup>a</sup>   | 1.61 <sup>a</sup>  | 1.60 <sup>a</sup>  | 1.65 <sup>a</sup>  | 1.51 <sup>b</sup>  | 1.27 <sup>c</sup>  | 1.60 <sup>a</sup>   | 1.25 <sup>c</sup> | 0.025 | <0.001  |
| Vitamin B6 metabolism                               | 1.54 <sup>ab</sup>  | 1.46 <sup>bc</sup> | 1.41 <sup>c</sup>  | 1.48 <sup>bc</sup> | 1.59 <sup>a</sup>  | 1.43 <sup>c</sup>  | 1.44 <sup>c</sup>   | 1.24 <sup>d</sup> | 0.018 | <0.001  |
| Nicotinate and nicotinamide metabolism              | 1.24 <sup>abc</sup> | 1.22 <sup>bc</sup> | 1.18 <sup>c</sup>  | 1.22 <sup>bc</sup> | 1.29 <sup>ab</sup> | 1.31 <sup>a</sup>  | 1.25 <sup>abc</sup> | 1.07 <sup>d</sup> | 0.013 | 0.001   |
| Biotin metabolism                                   | 1.34 <sup>bcd</sup> | 1.22 <sup>d</sup>  | 1.35 <sup>bc</sup> | 1.24 <sup>cd</sup> | 1.53 <sup>a</sup>  | 0.63 <sup>f</sup>  | 1.41 <sup>ab</sup>  | 0.85 <sup>e</sup> | 0.048 | <0.001  |
| Lipoic acid metabolism                              | 1.11 <sup>b</sup>   | 1.22 <sup>ab</sup> | 1.16 <sup>ab</sup> | 1.31 <sup>a</sup>  | 0.84 <sup>c</sup>  | 1.24 <sup>ab</sup> | 0.94 <sup>c</sup>   | 1.12 <sup>b</sup> | 0.031 | 0.001   |
| Riboflavin metabolism                               | 1.01 <sup>ab</sup>  | 0.97 <sup>b</sup>  | 0.99 <sup>ab</sup> | 1.00 <sup>ab</sup> | 1.04 <sup>a</sup>  | 0.55 <sup>c</sup>  | 1.01 <sup>ab</sup>  | 0.52 <sup>c</sup> | 0.033 | <0.001  |
| Porphyrin and chlorophyll metabolism                | 0.64 <sup>ab</sup>  | 0.64 <sup>ab</sup> | 0.66 <sup>ab</sup> | 0.66 <sup>a</sup>  | 0.59 <sup>b</sup>  | 0.21 <sup>d</sup>  | 0.65 <sup>ab</sup>  | 0.33 <sup>c</sup> | 0.027 | <0.001  |
| Ubiquinone and other terpenoid-quinone biosynthesis | 0.63 <sup>a</sup>   | 0.62 <sup>a</sup>  | 0.61 <sup>a</sup>  | 0.64 <sup>a</sup>  | 0.66 <sup>a</sup>  | 0.34 <sup>b</sup>  | 0.60 <sup>a</sup>   | 0.24 <sup>c</sup> | 0.025 | 0.002   |

<sup>1</sup>Each group includes two factors, one factor is rumen fluid phase, which included two levels: fresh fluid (FF) and autoclaved FF (AF); The other factor is rumen solid phase, which included four levels: fresh solid (FS), autoclaved FS (AS), fresh solid washing solution (FW), and autoclaved FW (AW).



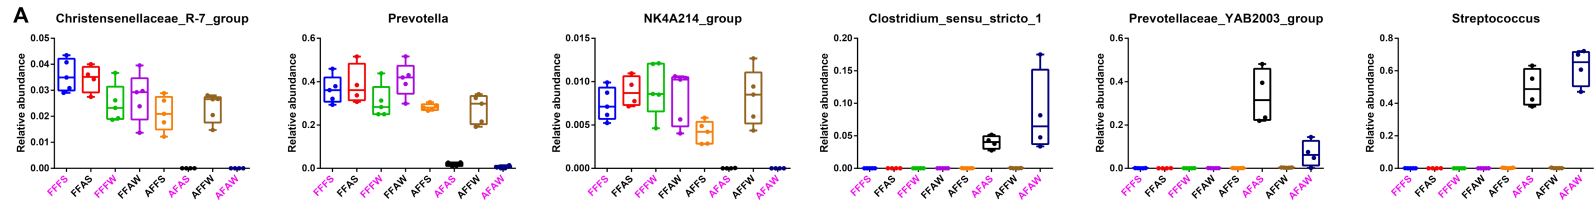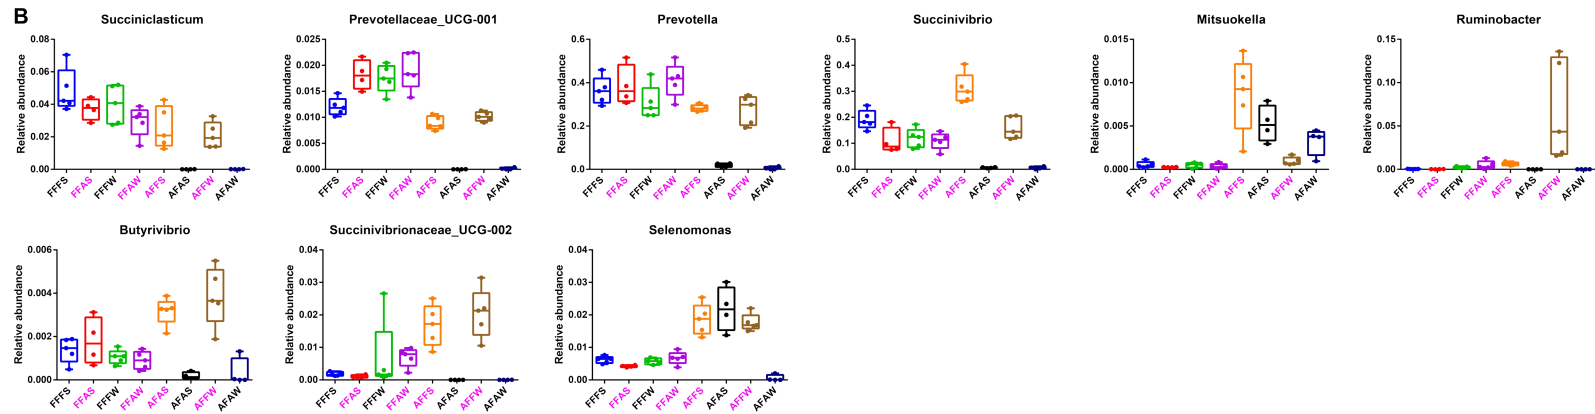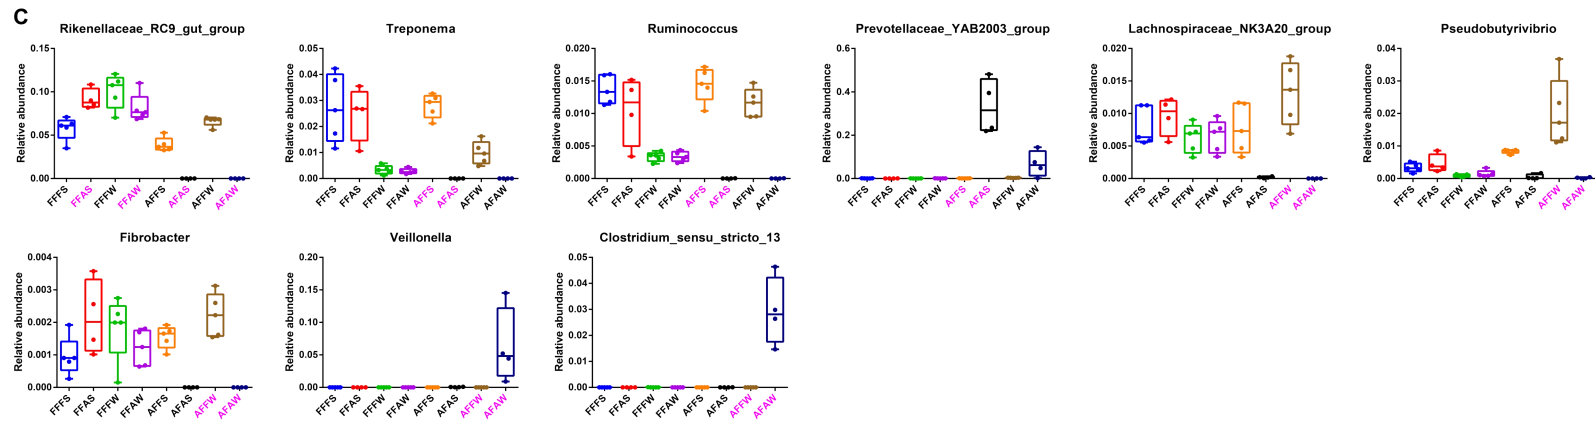

**Figure S1.** Main factors affecting the signature microbiota. **A.** Non-autoclaved vs all-autoclaved; **B.** fluid phase (F) vs solid phase (S) vs washing solution (W) **C.** fresh fluid (FF) vs autoclaved fluid (AF); fresh solid (FS) vs autoclaved solid (AS); fresh washing solution (FW) vs autoclaved washing solution (AW). FFFS = fresh fluid (FF) + fresh solid (FS); FFAS = fresh fluid (FF) + autoclaved solid (AS); FFFW = fresh fluid (FF) + fresh solid washing solution (FW); FFAW = fresh fluid (FF) + autoclaved solid washing solution (AW); AFFS = autoclaved fluid (AF) + fresh solid (FS); AFAS = autoclaved fluid (AF) + autoclaved solid (AS); AFFW = autoclaved fluid (AF) + fresh solid washing solution (FW); AFAW = autoclaved fluid (AF) + autoclaved solid washing solution (AW).

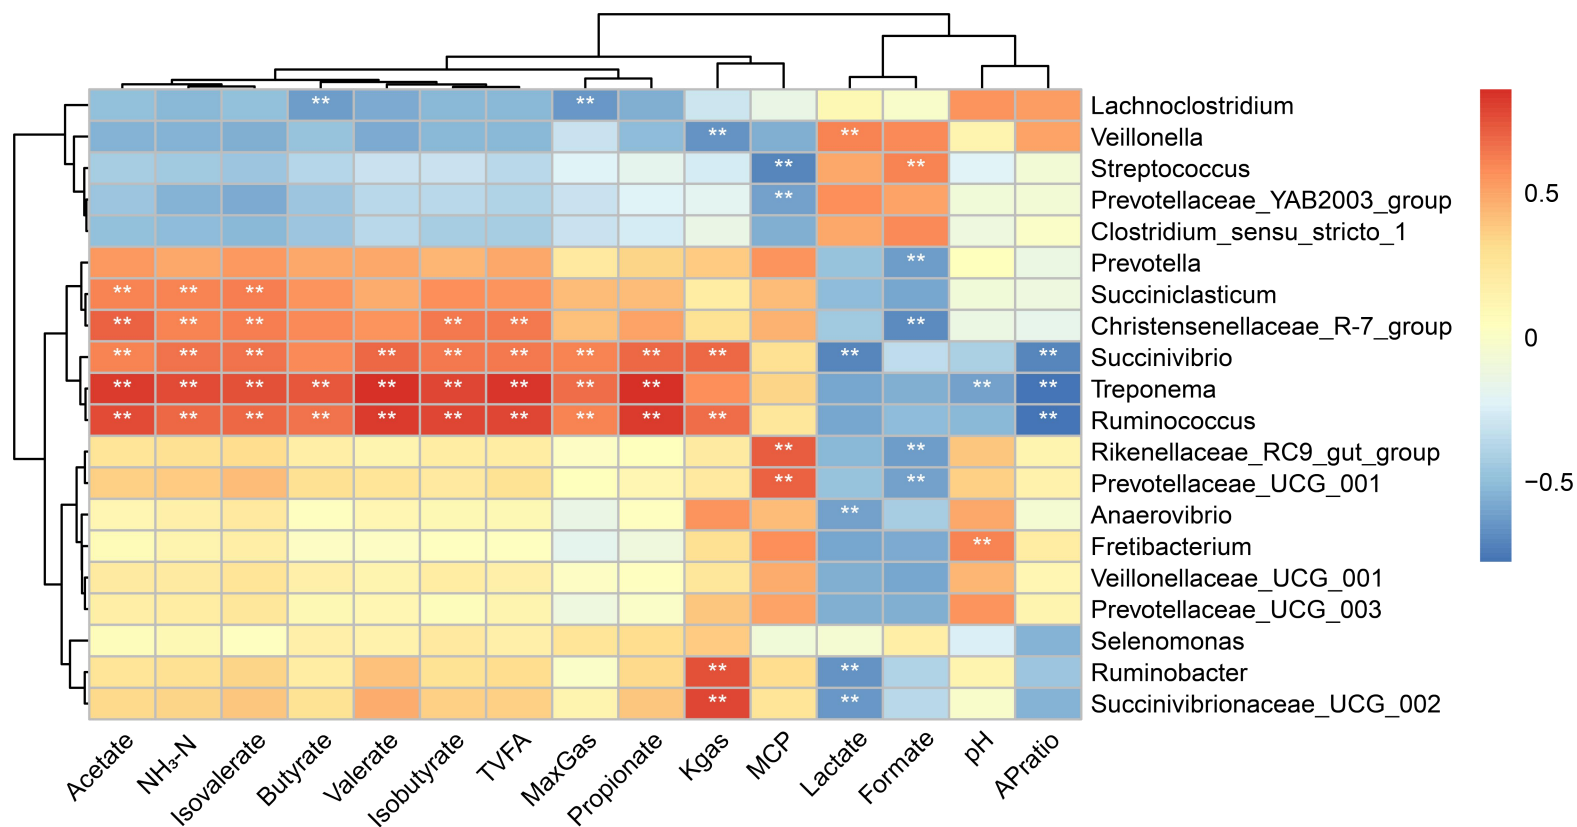

**Figure S2.** Correlation between the top 20 genera and fermentation parameters. Red color represents a positive correlation, while blue represents a negative correlation. Only strong (Spearman's  $|r| > 0.60$ ) and significant ( $P < 0.05$ ) correlations are presented in the figure. Strong correlations are indicated by red and blue colors with 1 indicating a perfect positive correlation (dark red) and  $-1$  indicating a negative correlation (dark blue), whereas weak correlations are indicated by yellow colors. Spearman test, \*  $p < 0.05$ , \*\*  $p < 0.01$ . TVFA, total VFA; MaxGas, asymptotic gas volume; Kgas, constant gas production rate; APratio, acetate to propionate ratio.

## REFERENCE

1. NRC. 2007. Nutrient requirements of small ruminants: sheep, goats, cervids, and new world camelids. National Academies Press, Washington, D.C.
